# Supplementary material for: Si-CSP9 regulates the integument and moulting process of larvae in the red imported fire ant, Solenopsis invicta
Source: PubMed Central journal article supplement (PMC4363891; doi:10.1038/srep09245), 2015-03-18
Supplement: srep09245-s1.pdf [file srep09245-s1.pdf]

1 Functions of Si-CSP: Si-CSP9 regulates the integument and molting process of larvae in the red  
2 imported fire ant, *Solenopsis invicta*  
3 Daifeng Cheng Yongyue Lu Ling Zeng Xiaofang He\* Guangwen Liang\*

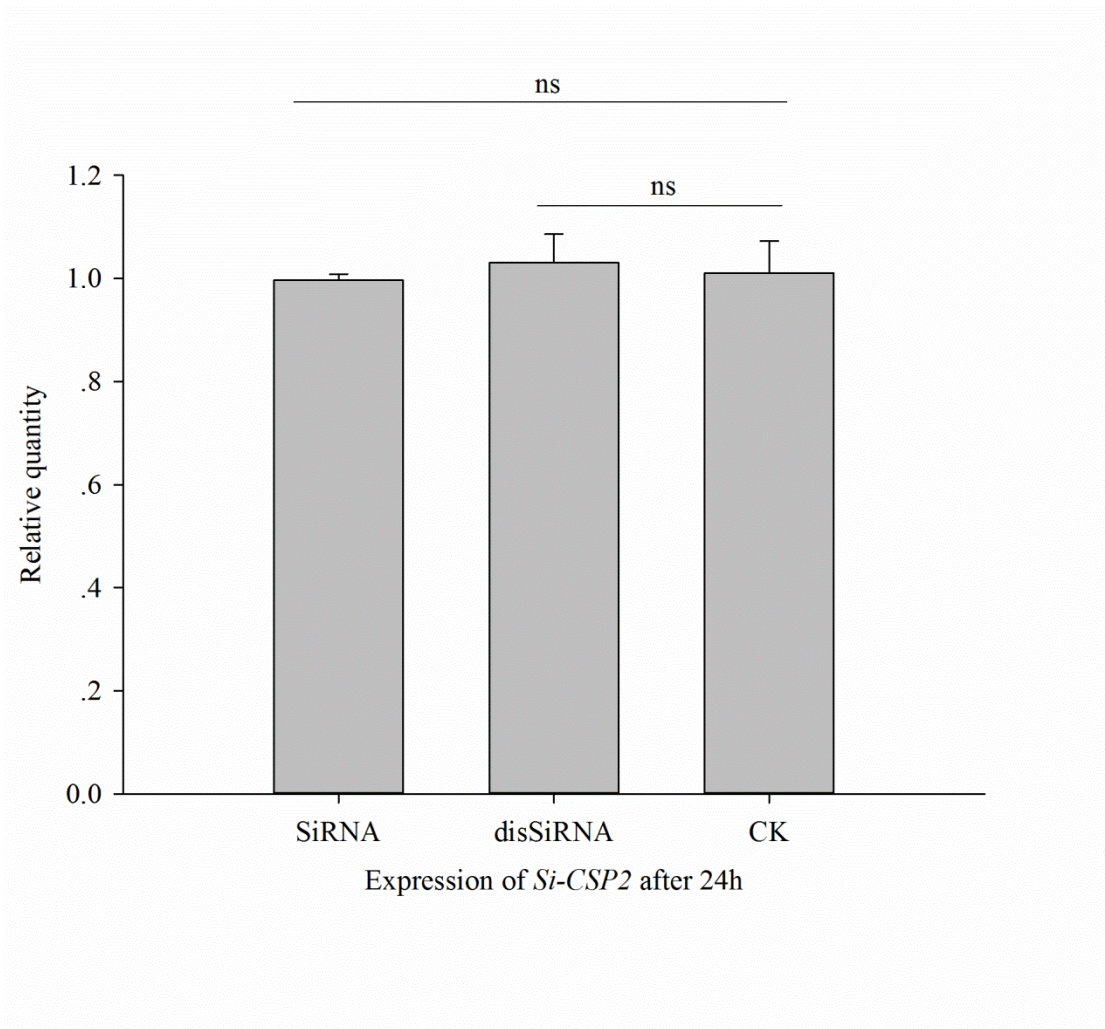

4

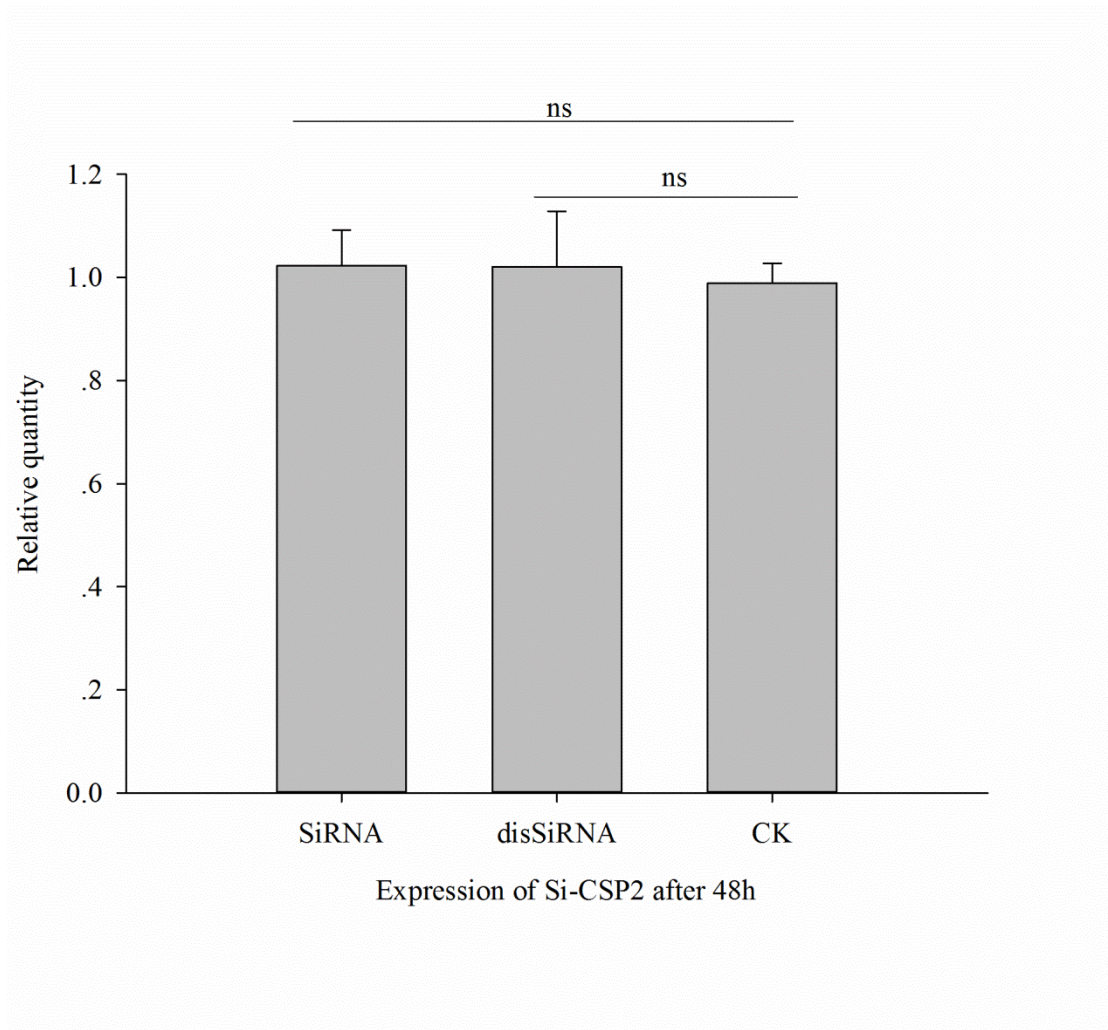

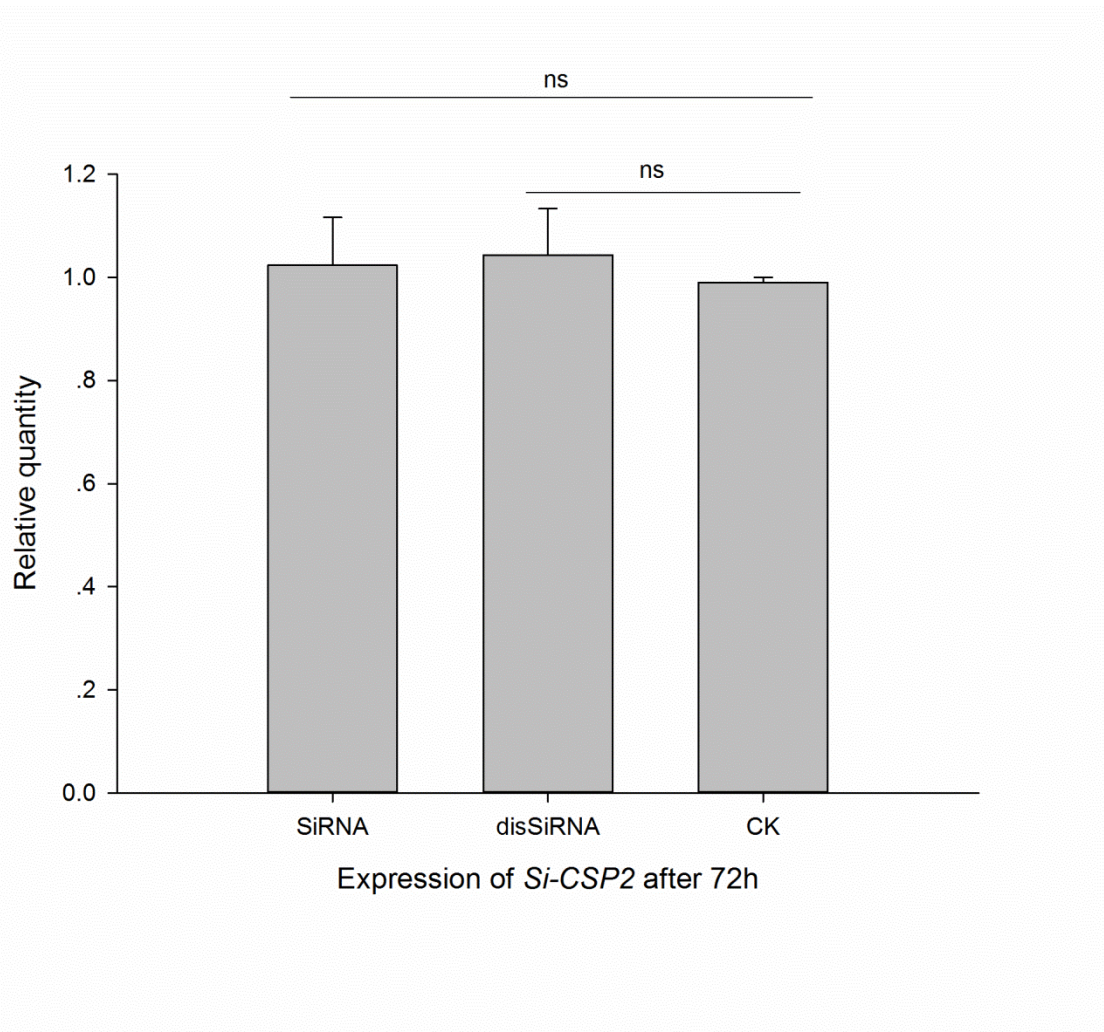

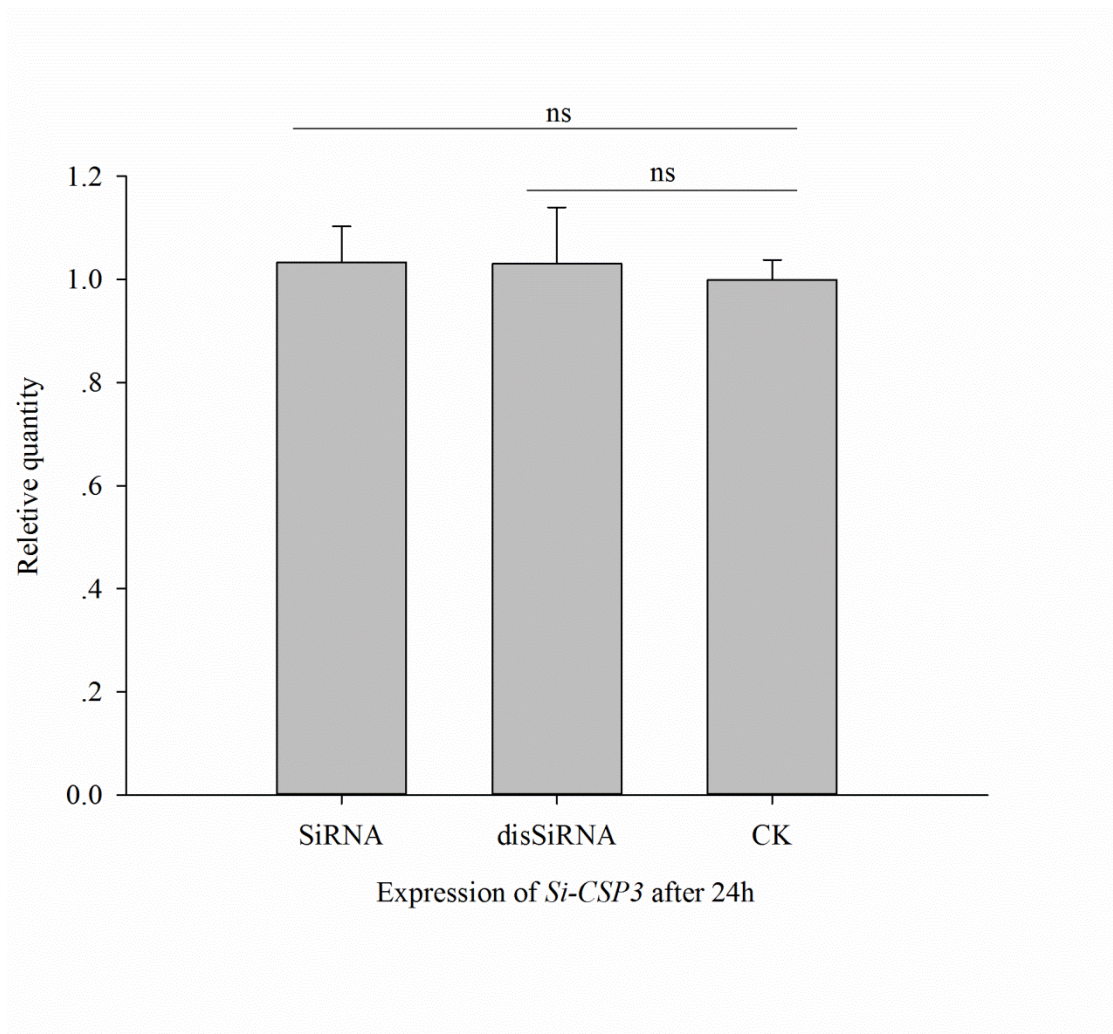

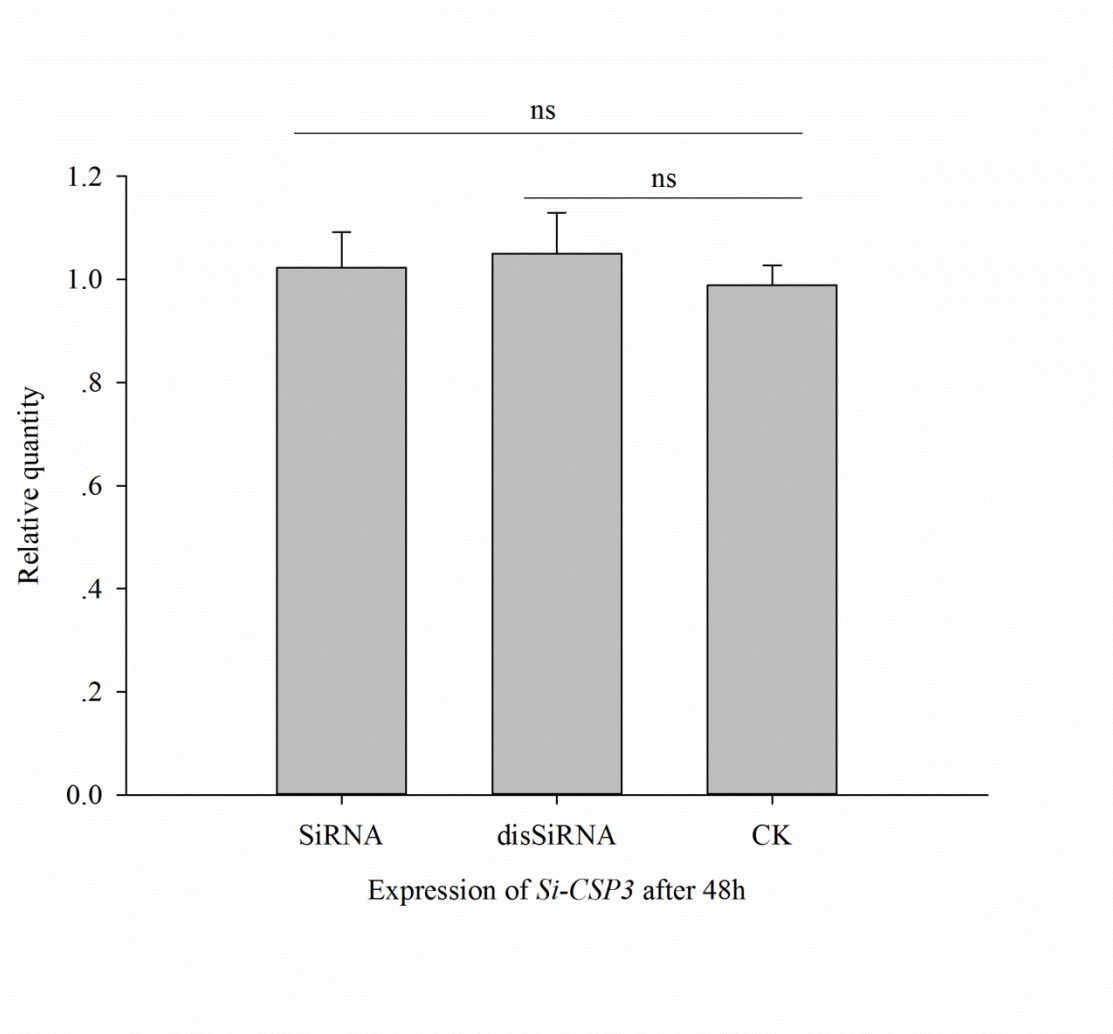

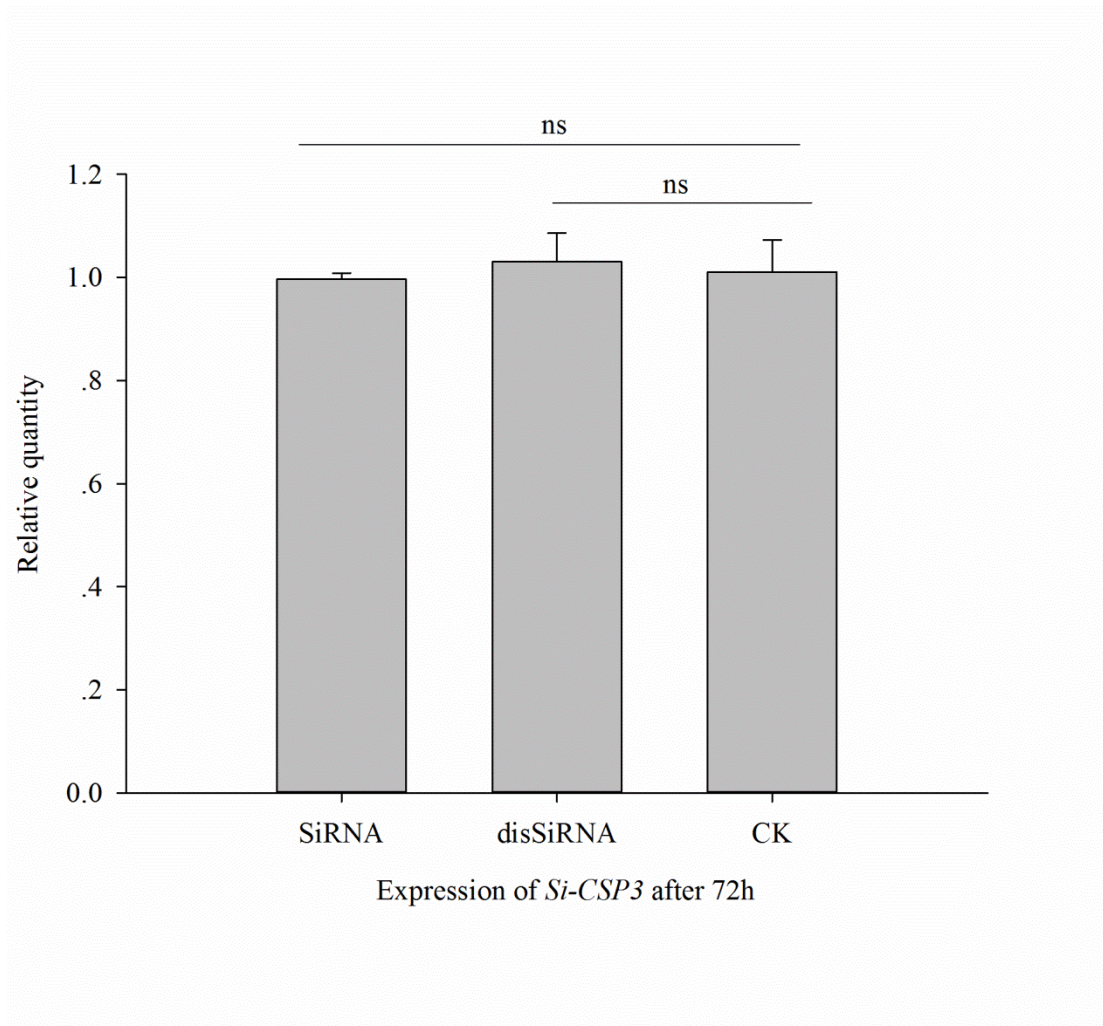

9

10 Supplementary Figure S1 Expression of *Si-CSP2* and *Si-CSP3* after *Si-CSP9* being  
 11 silenced.

12

13

SupplementaryTable S1 Genes used in phylogenetic tree reconstruction

|            | <i>Order</i>       | <i>Species</i>                 | <i>Name</i>             | <i>Accession number</i> |
|------------|--------------------|--------------------------------|-------------------------|-------------------------|
| <i>PKA</i> | <i>Diptera</i>     | <i>Muscadomestica</i>          | <i>MdomXP_005178559</i> | <i>XP_005178559</i>     |
|            | <i>Diptera</i>     | <i>Ceratitiscapitata</i>       | <i>CcapXP_004535521</i> | <i>XP_004535521</i>     |
|            | <i>Diptera</i>     | <i>Drosophila melanogaster</i> | <i>DmelAAM50541</i>     | <i>AAM50541</i>         |
|            | <i>Hymenoptera</i> | <i>Harpegnathossaltator</i>    | <i>HsalEFN86858</i>     | <i>EFN86858</i>         |
|            | <i>Hymenoptera</i> | <i>Nasoniavitripennis</i>      | <i>NvitXP_001603535</i> | <i>XP_001603535</i>     |
|            | <i>Hymenoptera</i> | <i>Acromyrmex_echinator</i>    | <i>AechEGI70994</i>     | <i>EGI70994</i>         |
|            | <i>Hymenoptera</i> | <i>Camponotus_floridanus</i>   | <i>CfloEFN64599</i>     | <i>EFN64599</i>         |
|            | <i>Hymenoptera</i> | <i>Apismellifera</i>           | <i>AmelXP_393711</i>    | <i>XP_393711</i>        |
|            | <i>Hymenoptera</i> | <i>Solenopsisinvicta</i>       | <i>PKA</i>              | <i>EFZ22638</i>         |
|            | <i>Lepidoptera</i> | <i>Bombyxmori</i>              | <i>BmorXP_004929251</i> | <i>XP_004929251</i>     |
|            | <i>Lepidoptera</i> | <i>Mamestrabrassicae</i>       | <i>MbraAFP95722</i>     | <i>AFP95722</i>         |

|      |                    |                                 |                  |              |
|------|--------------------|---------------------------------|------------------|--------------|
| FAT  | <i>Hymenoptera</i> | <i>Solenopsisinvicta</i>        | FAT1             | EFZ12838     |
|      | <i>Hymenoptera</i> | <i>Solenopsisinvicta</i>        | FAT2             | EFZ11472     |
|      | <i>Hymenoptera</i> | <i>Solenopsisinvicta</i>        | FAT3             | EFZ16301     |
|      | <i>Hymenoptera</i> | <i>Solenopsisinvicta</i>        | FAT4             | EFZ11482     |
|      | <i>Hymenoptera</i> | <i>Acromyrmexechinator</i>      | AechiEGI66297    | EGI66297     |
|      | <i>Hymenoptera</i> | <i>Camponotusfloridanus</i>     | CfloEFN75053     | EFN75053     |
|      | <i>Hymenoptera</i> | <i>Harpegnathossaltator</i>     | HsalEFN81866     | EFN81866     |
|      | <i>Hymenoptera</i> | <i>Apis mellifera</i>           | AmelXP_395426    | XP_395426    |
|      | <i>Hymenoptera</i> | <i>Apis florea</i>              | AfloXP_003690209 | XP_003690209 |
|      | <i>Hymenoptera</i> | <i>Bombus terrestris</i>        | BterNP_001267840 | NP_001267840 |
|      | <i>Homoptera</i>   | <i>Acyrtosiphon pisum</i>       | ApisXP_001949072 | XP_001949072 |
|      | <i>Diptera</i>     | <i>Musca domestica</i>          | MdomXP_005189399 | XP_005189399 |
|      | <i>Diptera</i>     | <i>Ceratitiscapitata</i>        | CcapXP_004524714 | XP_004524714 |
|      | <i>Diptera</i>     | <i>Aedes aegypti</i>            | AaegXP_001654967 | XP_001654967 |
|      | <i>Coleoptera</i>  | <i>Tribolium castaneum</i>      | TcasXP_970384    | XP_970384    |
| FAAH | <i>Hymenoptera</i> | <i>Solenopsisinvicta</i>        | FAAH             | EFZ09899     |
|      | <i>Hymenoptera</i> | <i>Acromyrmexechinator</i>      | AechEGI60868     | EGI60868     |
|      | <i>Hymenoptera</i> | <i>Harpegnathossaltator</i>     | HsalEFN75981     | EFN75981     |
|      | <i>Hymenoptera</i> | <i>Apis florea</i>              | AfloXP_003698394 | XP_003698394 |
|      | <i>Lepidoptera</i> | <i>Bombyx mori</i>              | BmorXP_004923963 | XP_004923963 |
|      | <i>Lepidoptera</i> | <i>Bombyx mori</i>              | BmorXP_004924016 | XP_004924016 |
|      | <i>Lepidoptera</i> | <i>Bombyx mori</i>              | BmorXP_004931785 | XP_004931785 |
|      | <i>Diptera</i>     | <i>Musca domestica</i>          | MdomXP_005185712 | XP_005185712 |
|      | <i>Diptera</i>     | <i>Ceratitiscapitata</i>        | CcapXP_004536939 | XP_004536939 |
|      | <i>Diptera</i>     | <i>Ceratitiscapitata</i>        | CcapXP_004523064 | XP_004523064 |
|      | <i>Homoptera</i>   | <i>Acyrtosiphon pisum</i>       | ApisXP_001946922 | XP_001946922 |
|      | <i>Coleoptera</i>  | <i>Anoplophora glabripennis</i> | AglaJAB65838     | JAB65838     |
